# Supplementary material for: Childhood hematologic cancer and residential proximity to oil and gas development
Source: PubMed Central journal article supplement (PMC5310851; doi:10.1371/journal.pone.0170423), 2017-02-15
Supplement: pone.0170423.s002.pdf [file pone.0170423.s002.pdf]

# **Supplemental Material: Childhood Hematologic Cancer and Residential Proximity to Oil and Gas Development in Rural Colorado**

Lisa M. McKenzie, William B. Allshouse, Tim E. Byers, Edward J. Bedrick, Berrin Serdar, and John L. Adgate

**S2 Table:** Adjusted logistic regression model 1 for association between annual inverse distance weighted well count within 16.1-kilometer radius of residence at diagnosis averaged over exposure period and acute lymphocytic leukemia (ALL)

**S2 Table:** Adjusted logistic regression model 1 for association between annual inverse distance weighted well count within 16.1-kilometer radius of residence at diagnosis averaged over exposure period and acute lymphocytic leukemia (ALL)

| Effect                                               | Odds Ratio Estimates |                            |     |
|------------------------------------------------------|----------------------|----------------------------|-----|
|                                                      | Point Estimate       | 95% Wald Confidence Limits |     |
| Low Tertile <sup>a</sup>                             | 2.3                  | 0.94                       | 5.5 |
| Medium Tertile <sup>a</sup>                          | 2.6                  | 1.1                        | 6.3 |
| High Tertile <sup>a</sup>                            | 1.9                  | 0.78                       | 4.8 |
| White Hispanic <sup>b</sup>                          | 0.64                 | 0.30                       | 1.4 |
| Other race <sup>b</sup>                              | 1.6                  | 0.68                       | 3.8 |
| Female <sup>c</sup>                                  | 0.79                 | 0.47                       | 1.3 |
| 0-4 years <sup>d</sup>                               | 25                   | 7.6                        | 85  |
| 5-9 years <sup>d</sup>                               | 42                   | 12                         | 150 |
| 10 -14 years <sup>d</sup>                            | 11                   | 3.1                        | 42  |
| 15-19 years <sup>d</sup>                             | 5.4                  | 1.4                        | 20  |
| ≥9000 feet <sup>e</sup>                              | 3.5                  | 0.97                       | 13  |
| Zip code level income 21-40 percentile <sup>f</sup>  | 0.77                 | 0.29                       | 2.1 |
| Zip code level income 41-60 percentile <sup>f</sup>  | 0.68                 | 0.23                       | 2.1 |
| Zip code level income 61-80 percentile <sup>f</sup>  | 0.79                 | 0.29                       | 2.2 |
| Zip code level income 81-100 percentile <sup>f</sup> | 0.91                 | 0.33                       | 2.5 |

<sup>a</sup>low = first tertile, greater than 0 to 2.7 wells per 1.6 kilometers, medium = second tertile, 2.7 to 31.4 wells per 1.6 kilometers, high = third tertile, more than 31.4 wells per 1.6 kilometers. <sup>b</sup>Reference group is white non-Hispanics. <sup>c</sup>Reference group is males. <sup>d</sup>Reference group is 20-24 years. <sup>e</sup>Reference group is < 9000 feet. <sup>f</sup>Reference group is 0-20 percentile.
