# Supplementary material for: Childhood hematologic cancer and residential proximity to oil and gas development
Source: PubMed Central journal article supplement (PMC5310851; doi:10.1371/journal.pone.0170423), 2017-02-15
Supplement: pone.0170423.s003.pdf [file pone.0170423.s003.pdf]

# **Supplemental Material: Childhood Hematologic Cancer and Residential Proximity to Oil and Gas Development in Rural Colorado**

Lisa M. McKenzie, William B. Allshouse, Tim E. Byers, Edward J. Bedrick, Berrin Serdar, and John L. Adgate

**S3 Table:** Adjusted logistic regression model 2 for association between annual inverse distance weighted well count within 16.1-kilometer radius of residence at diagnosis averaged over exposure period and acute lymphocytic leukemia (ALL)

**S3 Table:** Adjusted logistic regression model 2 for association between annual inverse distance weighted well count within 16.1-kilometer radius of residence at diagnosis averaged over exposure period and acute lymphocytic leukemia (ALL)

| <b>Odds Ratio Estimates</b>                                |                       |                                   |         |
|------------------------------------------------------------|-----------------------|-----------------------------------|---------|
| <b>Effect</b>                                              | <b>Point Estimate</b> | <b>95% Wald Confidence Limits</b> |         |
| <b>Low Tertile<sup>a</sup></b>                             | 2.479                 | 1.002                             | 6.135   |
| <b>Medium Tertile<sup>a</sup></b>                          | 2.794                 | 1.152                             | 6.776   |
| <b>High Tertile<sup>a</sup></b>                            | 1.999                 | 0.796                             | 5.017   |
| <b>White Hispanic<sup>b</sup></b>                          | 0.575                 | 0.261                             | 1.269   |
| <b>Other race<sup>b</sup></b>                              | 1.600                 | 0.671                             | 3.817   |
| <b>Female<sup>c</sup></b>                                  | 0.789                 | 0.467                             | 1.331   |
| <b>0-4 years<sup>d</sup></b>                               | 26.611                | 7.905                             | 89.587  |
| <b>5-9 years<sup>d</sup></b>                               | 42.430                | 11.876                            | 151.589 |
| <b>10 -14 years<sup>d</sup></b>                            | 12.679                | 3.386                             | 47.476  |
| <b>15-19 years<sup>d</sup></b>                             | 5.589                 | 1.491                             | 20.942  |
| <b>≥9000 feet<sup>e</sup></b>                              | 3.536                 | 0.947                             | 13.199  |
| <b>Zip code level income 21-40 percentile<sup>f</sup></b>  | 0.791                 | 0.290                             | 2.156   |
| <b>Zip code level income 41-60 percentile<sup>f</sup></b>  | 0.754                 | 0.248                             | 2.295   |
| <b>Zip code level income 61-80 percentile<sup>f</sup></b>  | 0.859                 | 0.310                             | 2.384   |
| <b>Zip code level income 81-100 percentile<sup>f</sup></b> | 0.974                 | 0.355                             | 2.677   |
| <b>year 1 vs 0<sup>g</sup></b>                             | 1.493                 | 0.565                             | 3.946   |
| <b>year 2 vs 0<sup>g</sup></b>                             | 1.525                 | 0.557                             | 4.178   |
| <b>year 3 vs 0<sup>g</sup></b>                             | 1.850                 | 0.700                             | 4.885   |
| <b>year 4 vs 0<sup>g</sup></b>                             | 0.856                 | 0.315                             | 2.327   |
| <b>year 5 vs 0<sup>g</sup></b>                             | 1.402                 | 0.549                             | 3.581   |

<sup>a</sup>low = first tertile, greater than 0 to 2.7 wells per 1.6 kilometers, medium = second tertile, 2.7 to 31.4 wells per 1.6 kilometers, high = third tertile, more than 31.4 wells per 1.6 kilometers. <sup>b</sup>Reference group is white non-Hispanics. <sup>c</sup>Reference group is males. <sup>d</sup>Reference group is 20-24 years. <sup>e</sup>Reference group is < 9000 feet. <sup>f</sup>Reference group is 0-20 percentile. <sup>g</sup>Reference group is year 0.
