# Supplementary material for: Childhood hematologic cancer and residential proximity to oil and gas development
Source: PubMed Central journal article supplement (PMC5310851; doi:10.1371/journal.pone.0170423), 2017-02-15
Supplement: pone.0170423.s004.pdf [file pone.0170423.s004.pdf]

# **Supplemental Material: Childhood Hematologic Cancer and Residential Proximity to Oil and Gas Development in Rural Colorado**

Lisa M. McKenzie, William B. Allshouse, Tim E. Byers, Edward J. Bedrick, Berrin Serdar, and John L. Adgate

**S4 Table:** Association between acute lymphocytic leukemia (ALL) and annual inverse distance weighted well count within 8-kilometer radius of residence at diagnosis averaged over exposure period

**S4 Table:** Association between acute lymphocytic leukemia (ALL) and annual inverse distance weighted well count within 8-kilometer radius of residence at diagnosis averaged over exposure period.

| <b>Inverse Distance Weighted Well Count<sup>a</sup></b> | <b>0 Wells within 8 kilometers</b> | <b>Low<sup>a</sup></b> | <b>Medium<sup>a</sup></b> | <b>High<sup>a</sup></b> | <b>P-value for trend test<sup>b</sup></b> |
|---------------------------------------------------------|------------------------------------|------------------------|---------------------------|-------------------------|-------------------------------------------|
| <b><i>Total Study Population (0 - 24 Years)</i></b>     |                                    |                        |                           |                         |                                           |
| Cases (N)                                               | 29                                 | 18                     | 19                        | 21                      |                                           |
| Controls (N)                                            | 229                                | 99                     | 98                        | 102                     |                                           |
| Crude OR                                                | 1.0                                | 1.4 (0.76, 2.7)        | 1.5 (0.82, 2.9)           | 1.6 (0.89, 3.0)         |                                           |
| Adjusted OR (95% CI) <sup>c</sup>                       | 1.0                                | 1.7 (0.81, 3.5)        | 1.7 (0.83, 3.5)           | 1.6 (0.76, 3.4)         | 0.16                                      |
| <b><i>5 to 24 Years</i></b>                             |                                    |                        |                           |                         |                                           |
| Cases (N)                                               | 11                                 | 10                     | 15                        | 12                      |                                           |
| Controls (N)                                            | 190                                | 84                     | 81                        | 76                      |                                           |
| Crude OR                                                | 1.0                                | 2.1 (0.84, 5.0)        | 3.2 (1.4, 7.3)            | 2.7 (1.2, 6.4)          |                                           |
| Model 1 Adjusted OR (95% CI) <sup>c</sup>               | 1.0                                | 2.7 (0.92, 8.2)        | 4.0 (1.4, 11)             | 3.8 (1.2, 12)           | 0.0094                                    |
| <b><i>0-4 Years</i></b>                                 |                                    |                        |                           |                         |                                           |
| Cases (N)                                               | 18                                 | 8                      | < 5                       | 9                       |                                           |
| Controls (N)                                            | 39                                 | 15                     | 17                        | 26                      |                                           |
| Crude OR                                                | 1.0                                | 1.2 (0.42, 3.2)        | 0.51 (0.15, 1.7)          | 0.75 (0.29, 1.9)        |                                           |
| Adjusted OR (95% CI) <sup>d</sup>                       | 1.0                                | 1.4 (0.46, 4.4)        | 0.47 (0.12, 1.7)          | 0.76 (0.26, 2.2)        | 0.36                                      |

<sup>a</sup>low = first tertile, greater than 0 to 2.7 wells per 1.6 kilometers, medium = second tertile, 2.7 to 31.4 wells per 1.6 kilometers, high = third tertile, more than 31.4 wells per 1.6 kilometers. <sup>b</sup>Trend tests performed by treating categorical inverse-distance well count as an ordinal. <sup>c</sup>Adjusted for age, race, gender, zip code level median income, and elevation.

<sup>d</sup>Adjusted for race, gender, zip code level median income, and elevation.
