# Supplementary material for: Childhood hematologic cancer and residential proximity to oil and gas development
Source: PubMed Central journal article supplement (PMC5310851; doi:10.1371/journal.pone.0170423), 2017-02-15
Supplement: pone.0170423.s005.pdf [file pone.0170423.s005.pdf]

# **Supplemental Material: Childhood Hematologic Cancer and Residential Proximity to Oil and Gas Development in Rural Colorado**

Lisa M. McKenzie, William B. Allshouse, Tim E. Byers, Edward J. Bedrick, Berrin Serdar, and John L. Adgate

**S5 Table:** Association between acute lymphocytic leukemia (ALL) and annual inverse distance weighted well count within 16.1-kilometer radius of residence at diagnosis averaged over exposure period : Subset of subjects with information on maternal smoking

**S5 Table:** Association between acute lymphocytic leukemia (ALL) and annual inverse distance weighted well count within 16.1-kilometer radius of residence at diagnosis averaged over exposure period: Subset of subjects with information on maternal smoking.

| <b>Inverse Distance Weighted Well Count<sup>a</sup></b> | <b>0 Wells within 8 kilometers</b> | <b>Low<sup>a</sup></b> | <b>Medium<sup>a</sup></b> | <b>High<sup>a</sup></b> | <b>P-value for trend test<sup>b</sup></b> |
|---------------------------------------------------------|------------------------------------|------------------------|---------------------------|-------------------------|-------------------------------------------|
| <b><i>(Total Study Population) 0 - 24 Years</i></b>     |                                    |                        |                           |                         |                                           |
| Cases (N)                                               | 8                                  | 11                     | 15                        | 18                      |                                           |
| Controls (N)                                            | 58                                 | 39                     | 55                        | 58                      |                                           |
| Crude OR                                                | 1.0                                | 2.0 (0.75, 5.4)        | 2.0 (0.78, 5.0)           | 2.3 (0.91, 5.6)         |                                           |
| Adjusted OR (95% CI) <sup>c</sup>                       | 1.0                                | 2.2 (0.64, 7.3)        | 2.0 (0.62, 6.2)           | 1.5 (0.47, 4.8)         | 0.72                                      |
| <b><i>5 to 24 Years</i></b>                             |                                    |                        |                           |                         |                                           |
| Cases (N)                                               | <5                                 | <5                     | 6                         | 10                      |                                           |
| Controls (N)                                            | 44                                 | 22                     | 37                        | 28                      |                                           |
| Crude OR                                                | 1.0                                | 1.3 (0.21, 8.6)        | 2.4 (0.56, 10)            | 5.2 (1.3, 21)           |                                           |
| Model 1 Adjusted OR (95% CI) <sup>c</sup>               | 1.0                                | 2.0 (0.20, 21)         | 2.4 (0.36, 16)            | 2.9 (0.42, 20)          | 0.29                                      |
| <b><i>0-4 Years</i></b>                                 |                                    |                        |                           |                         |                                           |
| Cases (N)                                               | 5                                  | 9                      | 9                         | 8                       |                                           |
| Controls (N)                                            | 14                                 | 17                     | 18                        | 30                      |                                           |
| Crude OR                                                | 1.0                                | 1.5 (0.40, 5.5)        | 1.4 (0.38, 5.1)           | 0.75 (0.21, 2.7)        |                                           |
| Adjusted OR (95% CI) <sup>d</sup>                       | 1.0                                | 1.5 (0.31, 7.3)        | 1.5 (0.30, 7.1)           | 0.77 (0.16, 3.8)        | 0.56                                      |

<sup>a</sup>Low = first tertile, < 4.96 wells per 1.6 kilometers, medium = second tertile, 4.9 to 33.6 wells per 1.6 kilometers, high = third tertile, more than 33.6 wells per 1.6 kilometers.

<sup>b</sup>Trend tests performed by treating categorical inverse-distance well count as an ordinal. <sup>c</sup>Adjusted for age, race, gender, zip code level median income, elevation, and maternal smoking. <sup>d</sup>Adjusted for race, gender, elevation, zip code level median income, and maternal smoking.
