# Supplementary material for: Childhood hematologic cancer and residential proximity to oil and gas development
Source: PubMed Central journal article supplement (PMC5310851; doi:10.1371/journal.pone.0170423), 2017-02-15
Supplement: pone.0170423.s006.pdf [file pone.0170423.s006.pdf]

# **Supplemental Material: Childhood Hematologic Cancer and Residential Proximity to Oil and Gas Development in Rural Colorado**

Lisa M. McKenzie, William B. Allshouse, Tim E. Byers, Edward J. Bedrick, Berrin Serdar, and John L. Adgate

**S6 Table:** Adjusted logistic regression model 1 for association between annual inverse distance weighted well count within 16.1-kilometer radius of residence at diagnosis averaged over exposure period and non-Hodgkin lymphoma

**S6 Table:** Adjusted logistic regression model 1 for association between annual inverse distance weighted well count within 16.1-kilometer radius of residence at diagnosis averaged over exposure period and non-Hodgkin lymphoma

| Effect                                               | Odds Ratio Estimates |                            |      |
|------------------------------------------------------|----------------------|----------------------------|------|
|                                                      | Point Estimate       | 95% Wald Confidence Limits |      |
| Low Tertile <sup>a</sup>                             | 1.2                  | 0.51                       | 2.9  |
| Medium Tertile <sup>a</sup>                          | 0.71                 | 0.28                       | 1.8  |
| High Tertile <sup>a</sup>                            | 1.0                  | 0.41                       | 2.6  |
| White Hispanic <sup>b</sup>                          | 0.40                 | 0.12                       | 1.4  |
| Other race <sup>b</sup>                              | 2.4                  | 0.94                       | 5.9  |
| Female <sup>c</sup>                                  | 0.48                 | 0.25                       | 0.93 |
| 0-4 years <sup>d</sup>                               | 0.57                 | 0.29                       | 1.7  |
| 5-9 years <sup>d</sup>                               | 3.1                  | 1.2                        | 8.1  |
| 10 -14 years <sup>d</sup>                            | 2.1                  | 0.86                       | 5.2  |
| 15-19 years <sup>d</sup>                             | 1.1                  | 0.48                       | 2.5  |
| ≥9000 feet <sup>e</sup>                              | 0.60                 | 0.0766                     | 5.4  |
| Zip code level income 21-40 percentile <sup>f</sup>  | 2.0                  | 0.41                       | 10   |
| Zip code level income 41-60 percentile <sup>f</sup>  | 7.1                  | 1.4                        | 35   |
| Zip code level income 61-80 percentile <sup>f</sup>  | 3.4                  | 0.70                       | 17   |
| Zip code level income 81-100 percentile <sup>f</sup> | 2.3                  | 0.44                       | 12   |

<sup>a</sup> low = first tertile, greater than 0 to 2.7 wells per 1.6 kilometers, medium = second tertile, 2.7 to 31.4 wells per 1.6 kilometers, high = third tertile, more than 31.4 wells per 1.6 kilometers. <sup>b</sup>Reference group is white non-Hispanics. <sup>c</sup>Reference group is males. <sup>d</sup>Reference group is 20-24 years. <sup>e</sup>Reference group is < 9000 feet. <sup>f</sup>Reference group is 0-20 percentile.
