# Supplementary material for: Childhood hematologic cancer and residential proximity to oil and gas development
Source: PubMed Central journal article supplement (PMC5310851; doi:10.1371/journal.pone.0170423), 2017-02-15
Supplement: pone.0170423.s007.pdf [file pone.0170423.s007.pdf]

# **Supplemental Material: Childhood Hematologic Cancer and Residential Proximity to Oil and Gas Development in Rural Colorado**

Lisa M. McKenzie, William B. Allshouse, Tim E. Byers, Edward J. Bedrick, Berrin Serdar, and John L. Adgate

**S7 Table:** Adjusted logistic regression model 2 for association between annual inverse distance weighted well count within 16.1-kilometer radius of residence at diagnosis averaged over exposure period and non-Hodgkin lymphoma

**S7 Table:** Adjusted logistic regression model 2 for association between annual inverse distance weighted well count within 16.1-kilometer radius of residence at diagnosis averaged over exposure period and non-Hodgkin lymphoma

| <b>Odds Ratio Estimates</b>                                |                       |                                   |
|------------------------------------------------------------|-----------------------|-----------------------------------|
| <b>Effect</b>                                              | <b>Point Estimate</b> | <b>95% Wald Confidence Limits</b> |
| <b>Low Tertile<sup>a</sup></b>                             | 1.177                 | 0.487 2.844                       |
| <b>Medium Tertile<sup>a</sup></b>                          | 0.632                 | 0.247 1.620                       |
| <b>High Tertile<sup>a</sup></b>                            | 0.985                 | 0.389 2.494                       |
| <b>White Hispanic<sup>b</sup></b>                          | 0.431                 | 0.126 1.482                       |
| <b>Other race<sup>b</sup></b>                              | 2.615                 | 1.038 6.590                       |
| <b>Female<sup>c</sup></b>                                  | 0.487                 | 0.252 0.943                       |
| <b>0-4 years<sup>d</sup></b>                               | 0.504                 | 0.169 1.503                       |
| <b>5-9 years<sup>d</sup></b>                               | 3.177                 | 1.213 8.324                       |
| <b>10 -14 years<sup>d</sup></b>                            | 1.912                 | 0.770 4.748                       |
| <b>15-19 years<sup>d</sup></b>                             | 1.081                 | 0.472 2.477                       |
| <b>≥9000 feet<sup>e</sup></b>                              | 0.570                 | 0.063 5.186                       |
| <b>Zip code level income 21-40 percentile<sup>f</sup></b>  | 2.141                 | 0.422 10.872                      |
| <b>Zip code level income 41-60 percentile<sup>f</sup></b>  | 8.438                 | 1.615 44.081                      |
| <b>Zip code level income 61-80 percentile<sup>f</sup></b>  | 3.728                 | 0.743 18.691                      |
| <b>Zip code level income 81-100 percentile<sup>f</sup></b> | 2.517                 | 0.475 13.330                      |
| <b>year 1 vs 0<sup>g</sup></b>                             | 1.655                 | 0.525 5.221                       |
| <b>year 2 vs 0<sup>g</sup></b>                             | 1.509                 | 0.428 5.321                       |
| <b>year 3 vs 0<sup>g</sup></b>                             | 0.846                 | 0.234 3.058                       |
| <b>year 4 vs 0<sup>g</sup></b>                             | 1.815                 | 0.585 5.633                       |

| Odds Ratio Estimates     |                |                            |
|--------------------------|----------------|----------------------------|
| Effect                   | Point Estimate | 95% Wald Confidence Limits |
| year 5 vs 0 <sup>g</sup> | 0.876          | 0.266      2.886           |

<sup>a</sup>low = first tertile, greater than 0 to 2.7 wells per 1.6 kilometers, medium = second tertile, 2.7 to 31.4 wells per 1.6 kilometers, high = third tertile, more than 31.4 wells per 1.6 kilometers. <sup>b</sup>Reference group is white non-Hispanics. <sup>c</sup>Reference group is males. <sup>d</sup>Reference group is 20-24 years. <sup>e</sup>Reference group is < 9000 feet. <sup>f</sup>Reference group is 0-20 percentile. <sup>g</sup>Reference group is year 0.
