# Supplementary material for: Childhood hematologic cancer and residential proximity to oil and gas development
Source: PubMed Central journal article supplement (PMC5310851; doi:10.1371/journal.pone.0170423), 2017-02-15
Supplement: pone.0170423.s008.pdf [file pone.0170423.s008.pdf]

# **Supplemental Material: Childhood Hematologic Cancer and Residential Proximity to Oil and Gas Development in Rural Colorado**

Lisa M. McKenzie, William B. Allshouse, Tim E. Byers, Edward J. Bedrick, Berrin Serdar, and John L. Adgate

**S8 Table:** Association between non-Hodgkin Lymphoma (NHL) and annual inverse distance weighted well count within 8-kilometer radius of residence at diagnosis averaged over exposure period total study population (0-24 years)

**S8 Table:** Association non-Hodgkin Lymphoma (NHL) and between annual inverse distance weighted well count within 8-kilometer radius of residence at diagnosis averaged over exposure period total study population (0-24 years)

| <b>Inverse Distance Weighted Well Count</b> | <b>0 Wells within 8 kilometers</b> | <b>Low<sup>a</sup></b> | <b>Medium<sup>a</sup></b> | <b>High<sup>a</sup></b> | <b>P-value for trend test<sup>b</sup></b> |
|---------------------------------------------|------------------------------------|------------------------|---------------------------|-------------------------|-------------------------------------------|
| Cases (N)                                   | 18                                 | 12                     | 7                         | 13                      |                                           |
| Controls (N)                                | 229                                | 99                     | 98                        | 102                     |                                           |
| Crude OR                                    | 1.0                                | 1.5 (0.72, 3.3)        | 0.91 (0.37, 2.2)          | 1.6 (0.77, 3.4)         |                                           |
| Model 1 Adjusted OR (95% CI) <sup>c</sup>   | 1.0                                | 1.4 (0.62, 3.2)        | 0.66 (0.25, 1.7)          | 1.7 (0.71, 3.9)         | 0.56                                      |

<sup>a</sup>low = first tertile, greater than 0 to 2.7 wells per 1.6 kilometers, medium = second tertile, 2.71 to 31.4 wells per 1.6 kilometers, high = third tertile, 31.5 or more wells per 1.6 kilometers. <sup>b</sup>Trend tests performed by treating categorical inverse-distance well count as an ordinal. <sup>c</sup>Adjusted for age, race, gender, zip code level median income, and elevation.
