# Supplementary material for: Childhood hematologic cancer and residential proximity to oil and gas development
Source: PubMed Central journal article supplement (PMC5310851; doi:10.1371/journal.pone.0170423), 2017-02-15
Supplement: pone.0170423.s009.pdf [file pone.0170423.s009.pdf]

# **Supplemental Material: Childhood Hematologic Cancer and Residential Proximity to Oil and Gas Development in Rural Colorado**

Lisa M. McKenzie, William B. Allshouse, Tim E. Byers, Edward J. Bedrick, Berrin Serdar, and John L. Adgate

**S9 Table:** Association between non-Hodgkin Lymphoma (NHL) and annual inverse distance weighted well count within 16.1-kilometer radius of residence at diagnosis averaged over exposure period : Subset of subjects with information on maternal smoking total study population (0-24 years)

**S9 Table.** Association between non-Hodgkin lymphoma (NHL) and annual inverse distance weighted well count within 16.1-kilometer radius of residence at diagnosis averaged over exposure period: Subset of subjects with information on maternal smoking total study population (0-24 years)

| <b>Inverse Distance Weighted Well Count</b> | <b>0 Wells within 8 kilometers</b> | <b>Low<sup>a</sup></b> | <b>Medium<sup>a</sup></b> | <b>High<sup>a</sup></b> | <b>P-value for trend test<sup>b</sup></b> |
|---------------------------------------------|------------------------------------|------------------------|---------------------------|-------------------------|-------------------------------------------|
| Cases (N)                                   | <5                                 | 6                      | 6                         | 7                       |                                           |
| Controls (N)                                | 58                                 | 39                     | 55                        | 58                      |                                           |
| Crude OR                                    | 1.0                                | 3.0 (0.70, 13)         | 2.1 (0.50, 8.9)           | 2.3 (0.58, 9.5)         |                                           |
| Model 1 Adjusted OR (95% CI) <sup>c</sup>   | 1.0                                | 4.7 (0.86, 26)         | 1.5 (0.28, 7.7)           | 1.8 (0.33, 9.3)         | 0.97                                      |

<sup>a</sup> low = first tertile, < 4.9 wells per 1.6 kilometers, medium = second tertile, 4.9 to 33.6 wells per 1.6 kilometers, high = third tertile, more than 33.6 wells per 1.6 kilometers.

<sup>b</sup>Trend tests performed by treating categorical inverse-distance well count as an ordinal. <sup>c</sup>Adjusted for age, race, gender, elevation, zip code level median income, and maternal smoking.
