# Supplementary material for: Childhood hematologic cancer and residential proximity to oil and gas development
Source: PubMed Central journal article supplement (PMC5310851; doi:10.1371/journal.pone.0170423), 2017-02-15
Supplement: pone.0170423.s010.pdf [file pone.0170423.s010.pdf]

# **Supplemental Material: Childhood Hematologic Cancer and Residential Proximity to Oil and Gas Development in Rural Colorado**

Lisa M. McKenzie, William B. Allshouse, Tim E. Byers, Edward J. Bedrick, Berrin Serdar, and John L. Adgate

**S10 Table.** Association between annual inverse distance weighted well count within 16.1-kilometer radius of residence at diagnosis averaged over exposure period and acute lymphocytic leukemia (ALL): Each year of cancer diagnosis treated separately

**S10 Table. Association between annual inverse distance weighted well count within 16.1-kilometer radius of residence at diagnosis averaged over exposure period and acute lymphocytic leukemia (ALL): Each year of cancer diagnosis treated separately.**

| Inverse Distance Weighted Well Count <sup>a</sup> | 0 Wells within 16.1 Kilometers | Low <sup>a</sup> | Medium <sup>a</sup> | High <sup>a</sup> | P-value trend tests <sup>b</sup> |
|---------------------------------------------------|--------------------------------|------------------|---------------------|-------------------|----------------------------------|
| <b>Total Study Population (0 to 24 years)</b>     |                                |                  |                     |                   |                                  |
| Cases (N)                                         | 15 (9.2%)                      | 21 (14%)         | 26 (18%)            | 25 (16%)          |                                  |
| Controls (N)                                      | 147                            | 132              | 119                 | 130               |                                  |
| Crude OR                                          | 1.0                            | 1.6 (0.77, 3.1)  | 2.1 (1.1, 4.2)      | 1.9 (0.95, 3.7)   |                                  |
| Model 1 Adjusted OR (95% CI) <sup>c</sup>         | 1.0                            | 2.3 (0.94, 5.5)  | 2.6 (1.1, 6.3)      | 1.9 (0.78, 4.8)   | 0.22                             |
| Model 2 Adjusted OR (95% CI) <sup>d</sup>         | 1.0                            | 2.4 (0.97, 6.1)  | 2.9 (1.2, 7.1)      | 1.9 (0.76, 4.9)   | 0.23                             |
| <b>5 to 24 Years</b>                              |                                |                  |                     |                   |                                  |
| Cases (N)                                         | 8 (5.9%)                       | 9 (7.7%)         | 15 (13%)            | 16 (14%)          |                                  |
| Controls (N)                                      | 128                            | 108              | 99                  | 96                |                                  |
| Crude OR                                          | 1.0                            | 1.3 (0.50, 3.6)  | 2.4 (0.99, 5.9)     | 2.7 (1.1, 6.5)    |                                  |
| Model 1 Adjusted OR (95% CI) <sup>c</sup>         | 1.0                            | 2.9 (0.80, 11)   | 3.4 (0.99, 12)      | 4.3 (1.1, 16)     | 0.035                            |
| Model 2 Adjusted OR (95% CI) <sup>d</sup>         | 1.0                            | 2.6 (0.67, 10)   | 3.6 (1.0, 13)       | 3.6 (0.93, 14)    | 0.056                            |
| <b>0 to 4 Years</b>                               |                                |                  |                     |                   |                                  |
| Cases (N)                                         | 7 (26%)                        | 12 (33%)         | 11 (35%)            | 9 (21%)           |                                  |
| Controls (N)                                      | 19                             | 24               | 20                  | 34                |                                  |
| Crude OR                                          | 1.0                            | 1.4 (0.45, 4.1)  | 1.5 (0.48, 4.7)     | 0.72 (0.23, 2.2)  |                                  |
| Model 1 Adjusted OR (95% CI) <sup>e</sup>         | 1.0                            | 1.7 (0.44, 6.5)  | 2.3 (0.57, 9.4)     | 0.73 (0.18, 3.0)  | 0.50                             |
| Model 2 Adjusted OR (95% CI) <sup>f</sup>         | 1.0                            | 1.7 (0.42, 7.2)  | 2.5 (0.56, 12)      | 0.5 (0.11, 2.3)   | 0.25                             |

<sup>a</sup> All age groups: low = first tertile, < 4.9 wells per 1.6 kilometers, medium = second tertile, 4.9 to 33.6 wells per 1.6 kilometers, high = third tertile, more than 33.6 wells per 1.6 kilometers. <sup>b</sup>Trend tests performed by treating categorical inverse-distance well count as an ordinal. <sup>c</sup>Adjusted for age, race, gender, socioeconomic status, and elevation. <sup>d</sup>Adjusted for age, race, gender, socioeconomic status, elevation, and year of diagnosis. <sup>e</sup>Adjusted for race, gender, socioeconomic status, and elevation. <sup>f</sup>Adjusted for race, gender, socioeconomic status, elevation, and year of diagnosis.
